# Supplementary material for: SOX11 regulates SWI/SNF complex components as member of the adrenergic neuroblastoma core regulatory circuitry
Source: PubMed Central journal article supplement (PMC9992472; doi:10.1038/s41467-023-36735-2), 2023-03-07
Supplement: 41467_2023_36735_MOESM3_ESM.pdf [file 41467_2023_36735_MOESM3_ESM.pdf]

## Description of Additional Supplementary Files

File Name: Supplementary Data 1

Description: Overview of clinico-genetic parameters of the tumors tested for SOX11 protein expression levels in the tissue micro-array data.

File Name: Supplementary Data 2

Description: Differentially expressed genes (adj.P.Val < 0.05) upon SOX11 knockdown in IMR-32, CLB-GA and NGP cells and SOX11 overexpression in SH-EP cells for 9h and 48h. Statistical testing was done using the empirical Bayes quasi-likelihood F-test.

File Name: Supplementary Data 3

Description: Gene signature of SOX11 early (differential upon SOX11 overexpression at 9h and SOX11 knockdown and correlated expression in 2 NB tumor cohorts) and late (differential upon SOX11 overexpression at 48h but not at 9h and differential upon SOX11 knockdown and correlated expression in 2 NB tumor cohorts) targets.

File Name: Supplementary Data 4

Description: SOX11 CUT&RUN and ChIP-seq targets in IMR-32, CLB-GA, NGP and SH-EP cells after SOX11 overexpression for 48h (MACS2, q.Val < 0.05, gene annotation with homer<sup>38</sup>).

File Name: Supplementary Data 5

Description: : SOX11 CUT&RUN and ChIP-seq motif analysis in IMR-32, CLB-GA, NGP and SH-EP cells after SOX11 overexpression for 48h using homer<sup>38</sup> motif enrichment (known motifs) 200 bp size around peak summit.

File Name: Supplementary Data 6

Description: Cell lines used in the manuscript with the sample ID, origin and MYCN amplification status.
